# Supplementary material for: The Influence of Hop Latent Viroid (HLVd) Infection on Gene Expression and Secondary Metabolite Contents in Hop (Humulus lupulus L.) Glandular Trichomes
Source: MDPI journal article supplement (doi:10.3390/plants10112297), 2021-10-26
Supplement: s1 [file s1]

**Table S1.** Nucleotide sequences of qRT-PCR primers.

| Abbrev.   | Forward                   | Reverse                   |
|-----------|---------------------------|---------------------------|
| BCAT1     | CGCCTGCTGCAAATGGTAC       | ACGCTCCTCAACCTTGAAACC     |
| VPS       | AGCCGGGCTGACATTTCACTT     | GGCCTCAATCAAGCTCTTCTCAA   |
| PT1L      | TCCAGGCTCGAGAGTTGGAT      | ACAACGTATTCCGCAGAGAAGAG   |
| PT2       | TCTTTGCATCTGCCTTAATCTTCA  | GCTCTCACTGGCCTCCTTA       |
| HS1       | CGCCTGGCATCCAATGAC        | GCGCAAGCTTTCTACCCAA       |
| HS2       | GGCATCCAATGACTCCCAATTTAG  | TGCGTGTGCAAGCTTTCTAC      |
| PAL       | CAGGCCATCGACTTGAGACAT     | GCTGGTCGTCAGCACTTTCTTAG   |
| 4CL2      | TGTGGCACCGTAGTTAGGAA      | CTCACCGGGCTCGTTATAGG      |
| CHSH1     | GGCTCACATTTTCATCTCCTCAA   | GGCCTCGACTAAGCTCTTC       |
| OMT1      | GCGGCTCCATATCAGAGCTTA     | ATGCCGGTGCTGTGGCAAT       |
| F3H       | TCAACCGGACCTGACTCTA       | GTCCTGTAGCAGAAGGGTTATGG   |
| LAR       | GAGGCGCATGGTTGAAGAG       | GGCCAAGAAGCGATGGAGTT      |
| GPPS-SSU  | CACGCGGCCAACTTCACT        | ACTTGGGTCGTAAGAATTGTGGATA |
| FPPS      | CCACTTCACCATCGCATTGTTT    | ACCAGCCATCACCAATGCACAAG   |
| MTS1      | ARTGCACTGGAGAATGMKAAGGTT  | AGCAAGCTCGAGAAAAGTGG      |
| MTS2      | GAGATGGCTTGGCTTTCAATAGG   | AGASTCTTTCGTTATGGGATTTGTG |
| STS1      | TTCGCCTCACTTGCTGATGA      | CCCACCTTTCAACTGCTTCA      |
| STS2      | ATTGCACTCACCTCAATTAC      | CCTAGCACTCTGCTCAATCGC     |
| TPS9      | CATGGCAAGAACTGCCCAATTC    | GTCGGTGCATGGTTTGACAATC    |
| NES       | CCAGCCGCTGAAGTGGA         | TGCGACAAGATTGGGTCTGT      |
| MYB3      | GCTCCAGTACGGGTCGGATA      | CCTCGCTCCACCAATTCTCTA     |
| MYB8      | GGAGCAATAAACGTGGGAGATTG   | AGGTGGCGTGCTTATTGAC       |
| MYB78     | TACACGCCGAGAACTCTA        | GGCGAAACCTGAGTCCCAA       |
| bHLH2     | GGGTGCGAGAAGAGGAAATTGAG   | GGTGGCGATGCAGACTGAT       |
| bHLH4     | CTCACTCAGTTCAGTCATCCACTA  | TGCTGCTGTTGAAGAACTTGATC   |
| WRKY1     | GGCCGTCAAGAACAACAAATTTCC  | CCCTTCGTCTTTCGTTAACCTC    |
| TFIIIA-F1 | GAGGCCGCATGTATGTTCTG      |                           |
| TFIIIA-F2 | GGACCTCGATCACGCTACATTGAG  |                           |
| TFIIIA-F3 | CATATGCAAAGCCATTCTCTTGAG  |                           |
| TFIIIA-R  | GGCGAGTCAAGTGATCCTTTC     |                           |
| RPL5      | CCGTTGCTCAAACCGAATCA      | AGGGTGCCTTTGGTACTACTC     |
| TTG1      | CTCTGGGAGGTTCTGTGATAACTC  | TCGCTGGTCTTGCTGTTGT       |
| MYC2      | GAAGAGGGAGTTAGCAAGTAAAGAC | CCCACCGTGGTTTGACATC       |
| PIF4      | CTGCGGGAGCTTTCAAGGA       | CAGACCCACCAGAAGATGAAGTAAC |
| GAPDH     | AAGCAAGGACTGGAGAGGTG      | CCAGTGCTGCTGGGAATAAT      |
| RH46      | CCAACCTACTGGGCTTCGAC      | CAGAAATGGGTATGATCGGGC     |
